# Supplementary material for: Optimized Derivation of Predicted No-Effect Concentrations (PNECs) for Eight Polycyclic Aromatic Hydrocarbons (PAHs) Using HC10 Based on Acute Toxicity Data
Source: MDPI journal article supplement (doi:10.3390/toxics11070563), 2023-06-28
Supplement: s1 [file s1]

*Supplementary Materials*

# Optimized Derivation of Predicted No-Effect Concentrations (PNECs) for Eight Polycyclic Aromatic Hydrocarbons (PAHs) Using HC<sub>10</sub> Based on Acute Toxicity Data

Xiao Sun <sup>1,2,3</sup>, Ting-Ting Ding <sup>1,2</sup>, Ze-Jun Wang <sup>4</sup>, Peng Huang <sup>1,2</sup> and Shu-Shen Liu <sup>1,2,3,\*</sup>

<sup>1</sup> Key Laboratory of Yangtze River Water Environment, Ministry of Education, College of Environmental Science and Engineering, Tongji University, Shanghai 200092, China

<sup>2</sup> State Key Laboratory of Pollution Control and Resource Reuse, College of Environmental Science and Engineering, Tongji University, Shanghai 200092, China

<sup>3</sup> Shanghai Institute of Pollution Control and Ecological Security, Shanghai 200092, China

<sup>4</sup> National and Local Joint Engineering Laboratory of Municipal Sewage Resource Utilization Technology, School of Environmental Science and Engineering, Suzhou University of Science and Technology, Suzhou 215009, China

\* Correspondence: ssluohl@263.net; Tel.: +86-021-65982767

**Table S1.** Nine two-parameter functions ( $y=f(a, b, x)$ ) used to construct the SSD models.

| Function           | Expression                                                                 |
|--------------------|----------------------------------------------------------------------------|
| Arctangent         | $y = \frac{\frac{\pi}{2} + \arctan\left(\frac{x-a}{b}\right)}{\pi}$        |
| Dagum              | $y = \frac{1}{\left(1 + 10^{-ax}\right)^b}$                                |
| Error              | $y = \frac{1 + \operatorname{erf}\left(\frac{ax-b}{2}\right)}{2}$          |
| Gompertz           | $y = e^{-ae^{-bx}}$                                                        |
| Gudermannian       | $y = \frac{\frac{\pi}{2} + \arcsin\left(\tanh(ax-b)\right)}{\pi}$          |
| Hyperbolic tangent | $y = \frac{1 + \tanh(ax-b)}{2}$                                            |
| Logistic           | $y = \frac{1}{1 + e^{\frac{-(x-a)}{b}}}$                                   |
| Normal             | $y = \frac{1}{b\sqrt{2\pi}} \int_{-\infty}^x e^{-\frac{(t-a)^2}{2b^2}} dt$ |
| Weibull            | $y = 1 - e^{-e^{a+bx}}$                                                    |

**Table S2.** Acute toxicity values (AVs) ( $S_n=13$ ) of acenaphthene (ACE) to aquatic organisms.

| Aquatic biota | Species                                 | Phylum      | Family        | Exposure Type | Duratio<br>n (Days ) | Endpo<br>int     | Effect      | AV<br>( $\mu\text{g/L}$ ) | Geom.<br>.*<br>( $\mu\text{g/L}$ ) | Reference |
|---------------|-----------------------------------------|-------------|---------------|---------------|----------------------|------------------|-------------|---------------------------|------------------------------------|-----------|
| Algae         | <i>Raphidocelis subcapitata</i>         | Chlorophyta | Chlorellaceae | Static        | 4                    | EC <sub>50</sub> | Mortality   | 520                       |                                    | [49]      |
| Crustaceans   | <i>Daphnia magna</i>                    | Arthropoda  | Daphniidae    | Flow-through  | 2                    | LC <sub>50</sub> | Mortality   | 120                       |                                    | [50]      |
| Crustaceans   | <i>Gammarus minus</i>                   | Arthropoda  | Gammaridae    | Static        | 4                    | LC <sub>50</sub> | Growth rate | 460                       |                                    | [51]      |
| Fish          | <i>Ictalurus punctatus</i>              | Chordata    | Ictaluridae   | Flow-through  | 4                    | LC <sub>50</sub> | Mortality   | 1720                      |                                    | [52]      |
| Fish          | <i>Lepomis macrochirus</i>              | Chordata    | Centrarchidae | Static        | 4                    | LC <sub>50</sub> | Mortality   | 1700                      |                                    | [53]      |
| Fish          | <i>Oncorhynchus mykiss</i>              | Chordata    | Salmonidae    | Flow-through  | 4                    | LC <sub>50</sub> | Mortality   | 670                       |                                    | [52]      |
| Fish          | <i>Pimephales promelas</i>              | Chordata    | Cyprinidae    | Flow-through  | 4                    | LC <sub>50</sub> | Mortality   | 1400                      | 1732                               | [50]      |
|               |                                         |             |               | Flow-through  | 4                    | LC <sub>50</sub> | Mortality   | 1600                      |                                    | [52]      |
|               |                                         |             |               | Flow-through  | 4                    | LC <sub>50</sub> | Mortality   | 1730                      |                                    | [54]      |
|               |                                         |             |               | Flow-through  | 4                    | LC <sub>50</sub> | Mortality   | 608                       |                                    | [55]      |
|               |                                         |             |               | Static        | 4                    | LC <sub>50</sub> | Mortality   | 3700                      |                                    | [56]      |
| Fish          | <i>Salmo trutta</i>                     | Chordata    | Salmonidae    | Static        | 4                    | LC <sub>50</sub> | Mortality   | 3100                      |                                    | [57]      |
|               |                                         |             |               | Static        | 4                    | LC <sub>50</sub> | Mortality   | 580                       |                                    | [52]      |
|               |                                         |             |               | Static        | 4                    | LC <sub>50</sub> | Mortality   |                           |                                    |           |
| Insects       | <i>Paratanytarsus parthenogeneticus</i> | Arthropoda  | Chironomidae  | Static        | 2                    | LC <sub>50</sub> | Mortality   | 1800                      |                                    | [58]      |

|          |                              |            |               |              |   |                  |           |      |      |
|----------|------------------------------|------------|---------------|--------------|---|------------------|-----------|------|------|
| Insects  | <i>Paratanytarsus sp.</i>    | Arthropoda | Chironomidae  | Static       | 2 | LC <sub>50</sub> | Mortality | 60   | [59] |
| Insects  | <i>Tanytarsus dissimilis</i> | Arthropoda | Chironomidae  | Static       | 2 | LC <sub>50</sub> | Mortality | 2000 | [60] |
| Insects  | <i>Tallaperla maria</i>      | Arthropoda | Peltoperlidae | Static       | 4 | LC <sub>50</sub> | Mortality | 240  | [51] |
| Molluscs | <i>Aplexa hypnorum</i>       | Mollusca   | Physidae      | Flow-through | 4 | LC <sub>50</sub> | Mortality | 2040 | [52] |

\* Geom. refers to the geometrical mean of several values for one Species under one endpoint.

**Table S3.** Acute toxicity values (AVs) (S<sub>n</sub>=10) of anthracene (ANT) to aquatic organisms.

| Aquatic biota | Species                               | Phylum      | Family        | Exposure Type | Duration (Days) | Endpoint         | Effect         | AV (µg/L) | Geom.* (µg/L) | Reference |
|---------------|---------------------------------------|-------------|---------------|---------------|-----------------|------------------|----------------|-----------|---------------|-----------|
| Algae         | <i>Chlorella fusca var. vacuolata</i> | Chlorophyta | Chlorellaceae | Static        | 1               | EC <sub>50</sub> | Growth rate    | 18.54     |               | [61]      |
| Algae         | <i>Raphidocelis subcapitata</i>       | Chlorophyta | Chlorellaceae | Renewal       | 1               | EC <sub>50</sub> | Physiology     | 3.3       |               | [62]      |
| Crustaceans   | <i>Daphnia magna</i>                  | Arthropoda  | Daphniidae    | Static        | 2               | EC <sub>50</sub> | Immobilization | 35.65     | 33.59         | [63]      |
|               |                                       |             |               | Static        | 2               | EC <sub>50</sub> | Immobilization | 95        |               | [64]      |
|               |                                       |             |               |               | 2               | EC <sub>50</sub> | Survival       | 11.19     |               | [65]      |
| Crustaceans   | <i>Daphnia pulex</i>                  | Arthropoda  | Daphniidae    | Static        | 2               | EC <sub>50</sub> | Immobilization | 754       |               | [66]      |
| Crustaceans   | <i>Hyalalella azteca</i>              | Arthropoda  | Gammaridae    | Renewal       | 4               | EC <sub>50</sub> | Survival       | 873.7     |               | [67]      |
| Fish          | <i>Lepomis macrochirus</i>            | Chordata    | Centrarchidae | Flow-through  | 4               | LC <sub>50</sub> | Mortality      | 4.5       | 2.578         | [68]      |
|               |                                       |             |               | Flow-through  | 4               | LC <sub>50</sub> | Mortality      | 2.78      |               | [69]      |

|        |                               |            |               |              |   |                  |           |       |      |
|--------|-------------------------------|------------|---------------|--------------|---|------------------|-----------|-------|------|
|        |                               |            |               | Flow-through | 4 | LC <sub>50</sub> | Mortality | 1.27  | [70] |
|        |                               |            |               | Static       | 4 | LC <sub>50</sub> | Mortality | 2.78  | [71] |
| Fish   | <i>Lepomis sp.</i>            | Chordata   | Centrarchidae | Flow-through | 4 | LC <sub>50</sub> | Mortality | 11.92 | [69] |
| Insect | <i>Aedes aegypti</i>          | Arthropoda | Culicidae     | Static       | 1 | LC <sub>50</sub> | Mortality | 1     | [72] |
| Insect | <i>Aedes taeniorhynchus</i>   | Arthropoda | Culicidae     | Static       | 1 | LC <sub>50</sub> | Mortality | 260   | [72] |
| Insect | <i>Culex quinquefasciatus</i> | Arthropoda | Culicidae     | Static       | 1 | LC <sub>50</sub> | Mortality | 37    | [72] |

\* Geom. refers to the geometrical mean of several values for one Species under one endpoint.

**Table S4.** Acute toxicity values (AVs) (S<sub>n</sub>=21) and chronic toxicity values (CVs) (S<sub>n,c</sub>=8) of benzo[a]pyrene (B[a]P) to aquatic organisms.

| Aquatic biota | Species                                      | Phylum      | Family             | Exposure Type | Durati on (Days) | Endpoi nt        | Effect      | AV/C V (µg/L) | Reference |
|---------------|----------------------------------------------|-------------|--------------------|---------------|------------------|------------------|-------------|---------------|-----------|
| Algae         | <i>Anabaena flosaquae</i>                    | Cyanophyta  | Nostocaceae        | Static        | 3                | EC <sub>50</sub> | Growth      | 4000          | [73]      |
| Algae         | <i>Chlamydomonas reinhardtii</i>             | Chlorophyta | Chlamydomonadaceae | Static        | 3                | EC <sub>50</sub> | Growth      | 4000          | [73]      |
| Algae         | <i>Chlorella fusca</i> var. <i>vacuolata</i> | Chlorophyta | Chlorellaceae      | Static        | 1                | EC <sub>50</sub> | Growth rate | 0.6308        | [71]      |
| Algae         | <i>Euglena gracilis</i>                      | Euglenozoa  | Euglenaceae        | Static        | 3                | EC <sub>50</sub> | Growth      | 4000          | [74]      |
| Algae         | <i>Poteriochromonas malhamensis</i>          | Chrysophyta | Ochromonadaceae    | Static        | 3                | EC <sub>50</sub> | Growth      | 4000          | [73]      |
| Algae         | <i>Raphidocelis subcapitata</i>              | Chlorophyta | Chlorellaceae      | Static        | 2                | EC <sub>50</sub> | Growth rate | 6.9           | [74]      |
| Algae         | <i>Scenedesmus acutus</i>                    | Chlorophyta | Scenedesmaceae     | Static        | 3                | EC <sub>50</sub> | Growth      | 5             | [73]      |
| Amphibians    | <i>Rana limnocharis</i>                      | Chordata    | Ranidae            | Renewal       | 4                | LC <sub>50</sub> | Mortality   | 5.264         | [28]      |

|             |                                   |            |              |                |    |                  |              |       |      |
|-------------|-----------------------------------|------------|--------------|----------------|----|------------------|--------------|-------|------|
| Amphibians  | <i>Xenopus laevis</i>             | Chordata   | Pipidae      | Renewal        | 4  | EC <sub>50</sub> | Development  | 3331  | [75] |
| Annelida    | <i>Limnodrilus hoffmeisteri</i>   | Annelida   | Tubificidae  | Renewal        | 4  | LC <sub>50</sub> | Mortality    | 1.642 | [28] |
| Crustaceans | <i>Daphnia magna</i>              | Arthropoda | Daphniidae   |                | 2  | LC <sub>50</sub> | Mortality    | 1.298 | [76] |
| Crustaceans | <i>Daphnia pulex</i>              | Arthropoda | Daphniidae   | Static         | 4  | LC <sub>50</sub> | Mortality    | 5     | [77] |
| Crustaceans | <i>Eurytemora affinis</i>         | Arthropoda | Daphniidae   |                | 4  | LC <sub>50</sub> | Mortality    | 58    | [78] |
| Crustaceans | <i>Macrobrachium nipponense</i>   | Arthropoda | Palaemonidae | Renewal        | 4  | LC <sub>50</sub> | Mortality    | 7.632 | [28] |
| Crustaceans | <i>Palaemonetes pugio</i>         | Arthropoda | Palaemonidae |                | 4  | LC <sub>50</sub> | Mortality    | 1     | [78] |
| Fish        | <i>Cyprinus flammans</i>          | Chordata   | Cyprinidae   | Renewal        | 4  | LC <sub>50</sub> | Mortality    | 3.626 | [76] |
| Fish        | <i>Danio rerio</i>                | Chordata   | Cyprinidae   | Static         | 3  | EC <sub>50</sub> | Development  | 131.2 | [79] |
| Fish        | <i>Misgurnus anguillicaudatus</i> | Chordata   | Cobitidae    | Renewal        | 4  | LC <sub>50</sub> | Mortality    | 29.98 | [76] |
| Fish        | <i>Rhodeus sinensis</i>           | Chordata   | Cyprinidae   | Renewal        | 4  | LC <sub>50</sub> | Mortality    | 5     | [28] |
| Insect      | <i>Chironomus plumosus</i>        | Arthropoda | Chironomidae | Renewal        | 4  | LC <sub>50</sub> | Mortality    | 1.851 | [28] |
| Insect      | <i>Chironomus riparius</i>        | Arthropoda | Chironomidae | Static         | 1  | EC <sub>50</sub> | Intoxication | 5     | [80] |
| Crustaceans | <i>Daphnia magna</i>              | Arthropoda | Daphniidae   | Static-renewal | 21 | LC10             | Mortality    | 0.3   | [76] |
| Crustaceans | <i>Eurytemora affinis</i>         | Arthropoda | Daphniidae   | Renewal        | 21 | NOEC             | Development  | 12    | [81] |
| Fish        | <i>Carassius auratus</i>          | Chordata   | Cyprinidae   | Renewal        | 12 | NOEC             | Enzyme       | 0.3   | [82] |
| Fish        | <i>Chanos chanos</i>              | Chordata   | Chanidae     | Chanidae       | 28 | NOEC             | growth       | 0.82  | [83] |
| Fish        | <i>Cyprinus flammans</i>          | Chordata   | Cyprinidae   | Static-renewal | 28 | LC10             | Mortality    | 0.96  | [76] |
| Fish        | <i>Misgurnus anguillicaudatus</i> | Chordata   | Cobitidae    | Static-renewal | 28 | LC10             | Mortality    | 8.681 | [76] |

|          |                       |          |            |              |    |      |           |     |      |
|----------|-----------------------|----------|------------|--------------|----|------|-----------|-----|------|
| Fish     | <i>Zacco platypus</i> | Chordata | Cyprinidae | Flow-through | 14 | NOEC | Enzyme    | 0.2 | [84] |
| Molluscs | <i>Physella acuta</i> | Mollusca | Physidae   | Renewal      | 21 | NOEC | Mortality | 10  | [85] |

**Table S5.** Acute toxicity values (AVs) ( $S_n=31$ ) and chronic toxicity values (CVs) ( $S_{n,c}=10$ ) of fluoranthene (FLA) to aquatic organisms.

| Aquatic biota | Species                         | Phylum     | Family        | Exposure Type | Duration (Days) | Endpoint         | Effect      | AV/C V (µg/L) | Geom. * | Reference |
|---------------|---------------------------------|------------|---------------|---------------|-----------------|------------------|-------------|---------------|---------|-----------|
| Amphibians    | <i>Lithobates pipiens</i>       | Chordata   | Ranidae       | Renewal       | 4               | EC <sub>50</sub> | Development | 276           |         | [28]      |
| Amphibians    | <i>Rana limnocharis</i>         | Chordata   | Ranidae       | Renewal       | 4               | LC <sub>50</sub> | Mortality   | 8695          |         | [28]      |
| Amphibians    | <i>Xenopus laevis</i>           | Chordata   | Pipidae       | Renewal       | 4               | EC <sub>50</sub> | Development | 52            |         | [28]      |
| Crustaceans   | <i>Macrobrachium nipponense</i> | Arthropoda | Palaemonidae  | Renewal       | 4               | LC <sub>50</sub> | Mortality   | 3011          |         | [86]      |
| Crustaceans   | <i>Ceriodaphnia dubia</i>       | Arthropoda | Daphniidae    | Static        | 2               | LC <sub>50</sub> | Mortality   | 45            |         | [87]      |
| Crustaceans   | <i>Daphnia magna</i>            | Arthropoda | Daphniidae    | Renewal       | 2               | EC <sub>50</sub> | Mortality   | 117           |         | [88]      |
| Crustaceans   | <i>Eohaustorius estuarus</i>    | Arthropoda | Gammaridae    |               | 4               | LC <sub>50</sub> | Mortality   | 70            |         | [78]      |
| Crustaceans   | <i>Gammarus minus</i>           | Arthropoda | Gammaridae    | Static        | 4               | LC <sub>50</sub> | Mortality   | 32            |         | [89]      |
| Crustaceans   | <i>Gammarus pseudolimnaeus</i>  | Arthropoda | Gammaridae    | Flow-through  | 4               | LC <sub>50</sub> | Mortality   | 108           |         | [90]      |
| Crustaceans   | <i>Homarus americanus</i>       | Arthropoda | Nephropidae   |               | 4               | LC <sub>50</sub> | Mortality   | 120           |         | [78]      |
| Fish          | <i>Ictalurus punctatus</i>      | Chordata   | Ictaluridae   | Static        | 4               | LC <sub>50</sub> | Mortality   | 36            |         | [91]      |
| Fish          | <i>Lepomis macrochirus</i>      | Chordata   | Centrarchidae | Flow-through  |                 | EC <sub>50</sub> | Behavior    | 43.5          | 20.86   | [88]      |
|               |                                 |            |               | Flow-through  |                 | LC <sub>50</sub> | Mortality   | 10            |         | [90]      |

|               |                                   |            |              |              |   |                  |           |      |      |
|---------------|-----------------------------------|------------|--------------|--------------|---|------------------|-----------|------|------|
| Fish          | <i>Misgurnus anguillicaudatus</i> | Chordata   | Cobitidae    | Renewal      | 4 | LC <sub>50</sub> | Mortality | 1887 | [28] |
| Fish          | <i>Oncorhynchus mykiss</i>        | Chordata   | Salmonidae   | Flow-through | 4 | LC <sub>50</sub> | Mortality | 7.7  | [92] |
| Fish          | <i>Pimephales promelas</i>        | Chordata   | Cyprinidae   | Flow-through | 4 | LC <sub>50</sub> | Mortality | 12.2 | [92] |
| Fish          | <i>Pseudorasbora parva</i>        | Chordata   | Cyprinidae   | Renewal      | 4 | LC <sub>50</sub> | Mortality | 5177 | [28] |
| Fish          | <i>Rhodeus sinensis</i>           | Chordata   | Cyprinidae   | Renewal      | 4 | LC <sub>50</sub> | Mortality | 6251 | [28] |
| Invertebrates | <i>Hydra americana</i>            | Cnidaria   | Hydridae     | Flow-through | 4 | LC <sub>50</sub> | Mortality | 2.2  | [90] |
| Insect        | <i>Aedes aegypti</i>              | Arthropoda | Culicidae    | Static       | 1 | LC <sub>50</sub> | Mortality | 10   | [72] |
| Insect        | <i>Aedes taeniorhynchus</i>       | Arthropoda | Culicidae    | Static       | 1 | LC <sub>50</sub> | Mortality | 48   | [72] |
| Insect        | <i>Chironomus plumosus</i>        | Arthropoda | Chironomidae | Renewal      | 4 | LC <sub>50</sub> | Mortality | 7628 | [28] |

| Aquatic biota | Species                       | Phylum     | Family        | Exposure Type | Duration (Days) | Endpoint         | Effect    | AV/C V (µg/L) | Geom. * (µg/L) | Reference |
|---------------|-------------------------------|------------|---------------|---------------|-----------------|------------------|-----------|---------------|----------------|-----------|
| Insect        | <i>Culex quinquefasciatus</i> | Arthropoda | Culicidae     | Static        | 1               | LC <sub>50</sub> | Mortality | 45            |                | [72]      |
| Insect        | <i>Chironomus tentans</i>     | Arthropoda | Chironomidae  | Static        | 2               | EC <sub>50</sub> | Behavior  | 250           |                | [92]      |
| Insect        | <i>Ophiogomphus sp.</i>       | Arthropoda | Gomphidae     | Flow-through  |                 | LC <sub>50</sub> | Mortality | 110           | 139.9          | [90]      |
|               |                               |            |               | Flow-through  |                 | LC <sub>50</sub> | Mortality | 178           |                | [88]      |
| Insect        | <i>Tallaperla maria</i>       | Arthropoda | Peltoperlidae | Static        | 4               | LC <sub>50</sub> | Mortality | 135           |                | [89]      |
| Molluscs      | <i>Physa heterostrophus</i>   | Mollusca   | Retusidae     | Static        | 4               | LC <sub>50</sub> | Mortality | 137           |                | [89]      |



|               |                                   |              |              |              |      |                  |              |       |       |      |
|---------------|-----------------------------------|--------------|--------------|--------------|------|------------------|--------------|-------|-------|------|
| Molluscs      | <i>Physella virgata</i>           | Mollusca     | Retusidae    | Flow-through |      | LC <sub>50</sub> | Mortality    | 178   | 18.87 | [88] |
|               |                                   |              |              | Flow-through |      | LC <sub>50</sub> | Mortality    | 2     |       | [90] |
| Worms         | <i>Lumbriculus variegatus</i>     | Annelida     | Lumbricidae  | Flow-through | 4    | LC <sub>50</sub> | Mortality    | 1.2   |       | [90] |
| Worms         | <i>Stylaria lacustris</i>         | Annelida     | Naididae     | Static       | 2    | LC <sub>50</sub> | Mortality    | 220   |       | [93] |
| Invertebrates | <i>Hydra sp.</i>                  | Coelenterata | Hydridae     | Renewal      | 4    | LC <sub>50</sub> | Mortality    | 2032  |       | [28] |
| Invertebrates | <i>Limnodrilus hofmeisteri</i>    | Annelida     | Tubificidae  | Renewal      | 4    | LC <sub>50</sub> | Mortality    | 6313  |       | [28] |
| Crustaceans   | <i>Daphnia magna</i>              | Daphniidae   | Arthropoda   | Renewal      | 21   | NOEC             | Reproduction | 17    |       | [88] |
| Crustaceans   | <i>Diporeia sp.</i>               | Gammaridae   | Arthropoda   | Leaching     | 16   | NOEC             | Mortality    | 861.6 |       | [94] |
| Crustaceans   | <i>Hyaella azteca</i>             | Gammaridae   | Arthropoda   | Leaching     | 30   | NOEC             | Mortality    | 418.7 |       | [94] |
| Fish          | <i>Pimephales promelas</i>        | Cyprinidae   | Flow-through | Chordata     | 32   | NOEC             | Mortality    | 10.4  |       | [90] |
| Fish          | <i>Pseudorasbora parva</i>        | Chordata     | Cyprinidae   | Renewal      | 21   | EC <sub>10</sub> | Longevity    | 798   |       | [28] |
| Fish          | <i>Misgurnus anguillicaudatus</i> | Chordata     | Cobitidae    | Renewal      | 21   | EC <sub>10</sub> | Longevity    | 269   |       | [28] |
| Insect        | <i>Chironomus riparius</i>        | Chironomidae | Arthropoda   | Leaching     | 17.6 | NOEC             | Development  | 43    |       | [95] |
| Insect        | <i>Chironomus tentans</i>         | Chironomidae | Arthropoda   | Static       | 10   | NOEC             | Mortality    | 20    |       | [93] |
| Molluscs      | <i>Crassostrea virginica</i>      | Ostreidae    | Mollusca     | Renewal      | 21   | NOEC             | Morphology   | 10    |       | [96] |
| Worms         | <i>Stylaria lacustris</i>         | Naididae     | Annelida     | Static       | 10   | NOEC             | Mortality    | 115   |       | [93] |

\* Geom. refers to the geometrical mean of several values for one Species under one endpoint.

**Table S6.** Acute toxicity values (AVs) ( $S_n=10$ ) and chronic toxicity values (CVs) ( $S_n=5$ ) of fluorene (FLO) to aquatic organisms.

| Aquatic biota | Species                         | Phylum      | Family        | Exposure Type | Duration (Days) | Endpoint         | Effect       | AV/CV ( $\mu\text{g/L}$ ) | Geom.* ( $\mu\text{g/L}$ ) | Reference |
|---------------|---------------------------------|-------------|---------------|---------------|-----------------|------------------|--------------|---------------------------|----------------------------|-----------|
| Algae         | <i>Raphidocelis subcapitata</i> | Chlorophyta | Chlorellaceae | Static        | 4               | EC <sub>50</sub> | Growth rate  | 3400                      |                            | [97]      |
| Crustaceans   | <i>Daphnia magna</i>            | Arthropoda  | Daphniidae    | Static        | 2               | EC <sub>50</sub> | Intoxication | 430                       |                            | [97]      |
| Crustaceans   | <i>Daphnia pulex</i>            | Arthropoda  | Daphniidae    | Static        | 2               | EC <sub>50</sub> | Intoxication | 212                       |                            | [66]      |
| Crustaceans   | <i>Gammarus pseudolimnaeus</i>  | Arthropoda  | Gammaridae    | Static        | 4               | LC <sub>50</sub> | Mortality    | 600                       |                            | [97]      |
| Fish          | <i>Lepomis macrochirus</i>      | Chordata    | Centrarchidae | Static        | 4               | LC <sub>50</sub> | Mortality    | 910                       |                            | [97]      |
| Fish          | <i>Oncorhynchus mykiss</i>      | Chordata    | Salmonidae    | Static        | 4               | LC <sub>50</sub> | Mortality    | 820                       | 1281                       | [97]      |
|               |                                 |             |               | Renewal       | 4               | LC <sub>50</sub> | Mortality    | 2000                      |                            | [97]      |
| Fish          | <i>Pimephales promelas</i>      | Chordata    | Cyprinidae    | Static        | 4               | LC <sub>50</sub> | Mortality    | 100000                    |                            | [97]      |
| Insects       | <i>Chironomus plumosus</i>      | Arthropoda  | Chironomidae  | Static        | 2               | EC <sub>50</sub> | Intoxication | 2350                      |                            | [98]      |
| Insects       | <i>Chironomus riparius</i>      | Arthropoda  | Chironomidae  | Static        | 2               | EC <sub>50</sub> | Intoxication | 2350                      |                            | [97]      |
| Molluscs      | <i>Pleuroceridae</i>            | Mollusca    | Pleuroceridae | Static        | 4               | LC <sub>50</sub> | Mortality    | 5600                      |                            | [97]      |
| Algae         | <i>Chara sp.</i>                | Charophyta  | Characeae     | Static        | 21              | NOEC             | Growth       | 35000                     |                            | [97]      |
| Algae         | <i>Raphidocelis subcapitata</i> | Chlorophyta | Chlorellaceae | Static        | 14              | NOEC             | Growth rate  | 3330                      |                            | [97]      |
| Crustaceans   | <i>Daphnia magna</i>            | Arthropoda  | Daphniidae    | Flow-through  | 21              | NOEC             | Reproduction | 125                       |                            | [97]      |
| Fish          | <i>Lepomis macrochirus</i>      | Chordata    | Centrarchidae | Flow-through  | 30              | NOEC             | Accumulation | 125                       |                            | [97]      |

|        |                            |            |              |              |    |      |             |     |      |
|--------|----------------------------|------------|--------------|--------------|----|------|-------------|-----|------|
| Insect | <i>Chironomus riparius</i> | Arthropoda | Chironomidae | Flow-through | 30 | NOEC | Development | 290 | [97] |
|--------|----------------------------|------------|--------------|--------------|----|------|-------------|-----|------|

\* Geom. refers to the geometrical mean of several values for one Species under one endpoint.

**Table S7.** Acute toxicity values (AVs) ( $S_n=25$ ) of naphthalene (NAP) to aquatic organisms.

| Aquatic biota | Species                         | Phylum      | Family        | Exposure Type | Duratio<br>(Days) | Endpoint         | Effect       | AV/<br>CV<br>( $\mu\text{g/L}$ ) | Geo<br>m.*<br>( $\mu\text{g/L}$ ) | Reference |
|---------------|---------------------------------|-------------|---------------|---------------|-------------------|------------------|--------------|----------------------------------|-----------------------------------|-----------|
| Algae         | <i>Chlorella vulgaris</i>       | Chlorophyta | Chlorellaceae | Static        | 1                 | EC <sub>50</sub> | Growth       | 3300                             | 0                                 | [99]      |
| Algae         | <i>Raphidocelis subcapitata</i> | Chlorophyta | Chlorellaceae | Static        | 2                 | EC <sub>50</sub> | Growth rate  | 1000                             | 0                                 | [74]      |
| Amphibians    | <i>Xenopus laevis</i>           | Chordata    | Pipidae       | Flow-through  | 4                 | LC <sub>50</sub> | Mortality    | 2100                             |                                   | [100]     |
| Crustaceans   | <i>Callinectes sapidus</i>      | Arthropoda  | Portunidae    |               | 4                 | LC <sub>50</sub> |              | 2450                             |                                   | [78]      |
| Crustaceans   | <i>Daphnia magna</i>            | Arthropoda  | Daphniidae    | Static        | 2                 | EC <sub>50</sub> | Intoxication | 1600                             | 3672                              | [101]     |
|               |                                 |             |               | Static        | 2                 | LC <sub>50</sub> | Mortality    | 8600                             |                                   | [102]     |
|               |                                 |             |               | Static        | 2                 | EC <sub>50</sub> | Intoxication | 2194                             |                                   | [64]      |
|               |                                 |             |               | Static        | 2                 | EC <sub>50</sub> | Intoxication | 1600                             |                                   | [103]     |
|               |                                 |             |               | Static        | 2                 | LC <sub>50</sub> | Mortality    | 2260                             | 0                                 | [104]     |
|               |                                 |             |               | Static        | 2                 | LC <sub>50</sub> | Mortality    | 3400                             |                                   | [105]     |

|             |                                 |            |                 |              |   |                  |              |      |  |       |
|-------------|---------------------------------|------------|-----------------|--------------|---|------------------|--------------|------|--|-------|
|             |                                 |            |                 | Static       | 2 | LC <sub>50</sub> | Mortality    | 2160 |  | [106] |
|             |                                 |            |                 | Static       | 2 | EC <sub>50</sub> | Intoxication | 4730 |  | [63]  |
|             |                                 |            |                 | Flow-through | 2 | EC <sub>50</sub> | Mortality    | 1960 |  | [107] |
|             |                                 |            |                 | Static       | 2 | LC <sub>50</sub> | Mortality    | 6000 |  | [108] |
| Crustaceans | <i>Daphnia pulex</i>            | Arthropoda | Daphniidae      | Static       | 4 | LC <sub>50</sub> | Mortality    | 1000 |  | [77]  |
| Crustaceans | <i>Diaptomus forbesi</i>        | Arthropoda | Diaptomidae     | Static       | 4 | LC <sub>50</sub> | Mortality    | 6780 |  | [109] |
| Crustaceans | <i>Gammarus minus</i>           | Arthropoda | Gammaridae      | Static       | 2 | LC <sub>50</sub> | Mortality    | 3930 |  | [106] |
| Crustaceans | <i>Macrobrachium kistnensis</i> | Arthropoda | Palaemonidae    | Renewal      | 4 | LC <sub>50</sub> | Mortality    | 2000 |  | [110] |
| Crustaceans | <i>Macrobrachium superbum</i>   | Arthropoda | Palaemonidae    |              | 4 | LC <sub>50</sub> |              | 2500 |  | [78]  |
| Crustaceans | <i>Scylla serrata</i>           | Arthropoda | Portunidae      |              | 4 | LC <sub>50</sub> |              | 1770 |  | [7]   |
| Fish        | <i>Gambusia affinis</i>         | Chordata   | Poeciliidae     | Static       | 4 | LC <sub>50</sub> | Mortality    | 1500 |  | [111] |
| Fish        | <i>Lampetra tridentata</i>      | Chordata   | Petromyzonidae  | Renewal      | 4 | LC <sub>50</sub> | Mortality    | 1000 |  | [112] |
| Fish        | <i>Lepomis macrochirus</i>      | Chordata   | Centrarchidae   | Renewal      | 4 | LC <sub>50</sub> | Mortality    | 3200 |  | [101] |
| Fish        | <i>Melanotaenia fluviatilis</i> | Chordata   | Melanotaeniidae |              | 4 | LC <sub>50</sub> | Mortality    | 213  |  | [113] |
| Fish        | <i>Micropterus salmoides</i>    | Chordata   | Centrarchidae   | Flow-through | 3 | LC <sub>50</sub> | Mortality    | 240  |  | [114] |

|      |                              |          |            |              |   |                  |           |      |      |       |
|------|------------------------------|----------|------------|--------------|---|------------------|-----------|------|------|-------|
| Fish | <i>Oncorhynchus kisutch</i>  | Chordata | Salmonidae | Flow-through | 4 | LC <sub>50</sub> | Mortality | 2100 | 2986 | [101] |
|      |                              |          |            | Renewal      | 4 | LC <sub>50</sub> | Mortality | 5600 |      | [115] |
|      |                              |          |            | Flow-through | 4 | LC <sub>50</sub> | Mortality | 2100 |      | [116] |
|      |                              |          |            | Flow-through | 4 | LC <sub>50</sub> | Mortality | 3220 |      | [117] |
| Fish | <i>Oncorhynchus mykiss</i>   | Chordata | Salmonidae | Static       | 4 | LC <sub>50</sub> | Mortality | 1800 | 1897 | [118] |
|      |                              |          |            | Renewal      | 4 | LC <sub>50</sub> | Mortality | 2000 |      | [101] |
|      |                              |          |            | Flow-through | 4 | LC <sub>50</sub> | Mortality | 1600 |      | [119] |
|      |                              |          |            | Flow-through | 4 | LC <sub>50</sub> | Mortality | 2250 |      | [120] |
| Fish | <i>Oreochromis niloticus</i> | Chordata | Cichlidae  |              | 4 | LC <sub>50</sub> |           | 5900 |      | [78]  |
| Fish | <i>Pimephales promelas</i>   | Chordata | Cyprinidae | Flow-through | 4 | LC <sub>50</sub> | Mortality | 6080 | 5612 | [127] |
|      |                              |          |            | Static       | 4 | LC <sub>50</sub> | Mortality | 1990 |      | [106] |
|      |                              |          |            | Flow-through | 4 | LC <sub>50</sub> | Mortality | 6140 |      | [121] |
|      |                              |          |            | Flow-through | 4 | LC <sub>50</sub> | Mortality | 6140 |      | [122] |
|      |                              |          |            | Flow-through | 4 | LC <sub>50</sub> | Mortality | 7900 |      | [119] |
|      |                              |          |            | Flow-through | 4 | LC <sub>50</sub> | Mortality | 4900 |      | [120] |
|      |                              |          |            | Flow-through | 4 | LC <sub>50</sub> | Mortality | 9930 |      | [107] |
| Fish | <i>Tilapia zillii</i>        | Chordata | Cichlidae  |              | 4 | LC <sub>50</sub> | Mortality | 5900 |      | [122] |

|          |                              |            |              |        |   |                  |           |      |      |       |
|----------|------------------------------|------------|--------------|--------|---|------------------|-----------|------|------|-------|
| Insects  | <i>Chironomus attenuatus</i> | Arthropoda | Chironomidae | Static | 1 | LC <sub>50</sub> | Mortality | 1300 |      | [123] |
| Insects  | <i>Chironomus tentans</i>    | Arthropoda | Chironomidae | Static | 2 | LC <sub>50</sub> | Mortality | 2810 |      | [106] |
| Insects  | <i>Tanytarsus dissimilis</i> | Arthropoda | Chironomidae | Static | 2 | LC <sub>50</sub> | Mortality | 1260 | 1239 | [123] |
|          |                              |            |              | Static | 2 | LC <sub>50</sub> | Mortality | 1220 | 0    | [124] |
| Molluscs | <i>Physa gyrina</i>          | Mollusca   | Physidae     | Static | 2 | LC <sub>50</sub> | Mortality | 5020 |      | [106] |

\* Geom. refers to the geometrical mean of several values for one Species under one endpoint.

**Table S8.** Acute toxicity values (AVs) ( $S_n=29$ ) and chronic toxicity values (CVs) ( $S_{n,c}=9$ ) of phenanthrene (PHE) to aquatic organisms.

| Aquatic biota | Species                         | Phylum      | Family        | Exposure Type  | Duration (Days) | Endpoint         | Effect       | AV/CV ( $\mu\text{g/L}$ ) | Reference |
|---------------|---------------------------------|-------------|---------------|----------------|-----------------|------------------|--------------|---------------------------|-----------|
| Algae         | <i>Raphidocelis subcapitata</i> | Chlorophyta | Chlorellaceae | Static         | 3               | EC <sub>50</sub> | Growth rate  | 324                       | [125]     |
| Amphibian     | <i>Rana limnocharis</i>         | Chordata    | Ranidae       | Static-renewal | 4               | LC <sub>50</sub> | Mortality    | 631                       | [125]     |
| Crustaceans   | <i>Coldwater Shrimp</i>         | Arthropoda  | Pandalidae    | Static-renewal | 4               | LC <sub>50</sub> | Mortality    | 27                        | [125]     |
| Crustaceans   | <i>Daphnia pulex</i>            | Arthropoda  | Daphniidae    | Static         | 4               | LC <sub>50</sub> | Intoxication | 350                       | [66]      |
| Crustaceans   | <i>Daphnia magna</i>            | Arthropoda  | Daphniidae    | Static-renewal | 4               | LC <sub>50</sub> | Mortality    | 275                       | [125]     |
| Crustaceans   | <i>Diporeia sp.</i>             | Arthropoda  | Gammaridae    | Renewal        | 2               | EC <sub>50</sub> | Intoxication | 295                       | [128]     |
| Crustaceans   | <i>Eohaustorius estuaris</i>    | Arthropoda  | Gammaridae    |                | 4               | LC <sub>50</sub> | Mortality    | 158                       | [78]      |
| Crustaceans   | <i>Gammarus minus</i>           | Arthropoda  | Gammaridae    | Static         | 2               | LC <sub>50</sub> | Mortality    | 460                       | [106]     |

|                 |                                       |                |                     |                    |   |                  |                  |       |       |
|-----------------|---------------------------------------|----------------|---------------------|--------------------|---|------------------|------------------|-------|-------|
| Crustacea<br>ns | <i>Gammarus<br/>pseudolimnaeus</i>    | Arthropo<br>da | Gammaridae          | Flow-<br>through   | 4 | EC <sub>50</sub> | Intoxicati<br>on | 126   | [129] |
| Crustacea<br>ns | <i>Hyalella azteca</i>                | Arthropo<br>da | Gammaridae          | Renewal            | 4 | EC <sub>50</sub> | Mortality        | 564.5 | [67]  |
| Crustacea<br>ns | <i>Macrobrachium<br/>nipponense</i>   | Arthropo<br>da | Palaemonida<br>e    | Static-<br>renewal | 4 | LC <sub>50</sub> | Mortality        | 1079  | [126] |
| Crustacea<br>ns | <i>Neomysis<br/>awatschensis</i>      | Arthropo<br>da | Mysidae             | Renewal            | 4 | LC <sub>50</sub> | Mortality        | 126   | [130] |
| Fish            | <i>Cyprinodon<br/>variegatus</i>      | Chordata       | Cyprinodont<br>idae |                    | 4 | LC <sub>50</sub> | Mortality        | 478   | [78]  |
| Fish            | <i>Lepomis macrochirus</i>            | Chordata       | Centrarchida<br>e   | Flow-<br>through   | 4 | EC <sub>50</sub> | Behavior         | 49    | [129] |
| Fish            | <i>Lutjanus<br/>erythropterus</i>     | Chordata       | Lutjanidae          | semi-static        | 4 | LC <sub>50</sub> | Mortality        | 3170  | [131] |
| Fish            | <i>Micropterus salmoides</i>          | Chordata       | Centrarchida<br>e   | Flow-<br>through   | 3 | LC <sub>50</sub> | Mortality        | 70    | [114] |
| Fish            | <i>Misgurnus<br/>anguillicaudatus</i> | Chordata       | Cobitidae           | Static-<br>renewal | 4 | LC <sub>50</sub> | Mortality        | 3684  | [126] |
| Fish            | <i>Oncorhynchus mykiss</i>            | Chordata       | Salmonidae          | Flow-<br>through   | 4 | EC <sub>50</sub> | Behavior         | 50    | [129] |
| Fish            | <i>Oncorhynchus<br/>tshawytscha</i>   | Chordata       | Salmonidae          | Static-<br>renewal | 4 | LC <sub>50</sub> | Mortality        | 478   | [126] |
| Fish            | <i>Oreochromis<br/>mossambicus</i>    | Chordata       | Cichlidae           | Static-<br>renewal | 4 | LC <sub>50</sub> | Mortality        | 600   | [126] |
| Fish            | <i>Pseudorasbora parva</i>            | Chordata       | Cyprinidae          |                    | 4 | LC <sub>50</sub> | Mortality        | 220   | [132] |
| Fish            | <i>Ptychocheilus lucius</i>           | Chordata       | Cyprinidae          | Static-<br>renewal | 4 | LC <sub>50</sub> | Mortality        | 126   | [126] |
| Fish            | <i>Rhodeus sinensis</i>               | Chordata       | Cyprinidae          | Static-<br>renewal | 4 | LC <sub>50</sub> | Mortality        | 2550  | [126] |
| Fish            | <i>Tanichthys albonubes</i>           | Chordata       | Cyprinidae          | Static             | 4 | LC <sub>50</sub> | Mortality        | 913   | [133] |

Table S8. (Continued).

| Aquatic biota | Species                           | Phylum       | Family           | Exposure Type  | Duration (Days) | Endpoint         | Effect       | AV/C V (µg/L) | Reference |
|---------------|-----------------------------------|--------------|------------------|----------------|-----------------|------------------|--------------|---------------|-----------|
| Insects       | <i>Chironomus plumosus</i>        | Arthropoda   | Chironomidae     | Static-renewal | 4               | LC <sub>50</sub> | Mortality    | 462           | [126]     |
| Insects       | <i>Chironomus tentans</i>         | Arthropoda   | Chironomidae     | Static         | 2               | LC <sub>50</sub> | Mortality    | 490           | [106]     |
| Invertebrates | <i>Hydra sp.</i>                  | Coelenterata | Hydridae         | Flow-through   | 4               | EC <sub>50</sub> | Growth       | 96            | [129]     |
| Worms         | <i>Lumbriculus variegatus</i>     | Annelida     | Lumbriculidae    | Flow-through   | 4               | EC <sub>50</sub> | Intoxication | 419           | [129]     |
| Worms         | <i>Limnodrilus hoffmeisteri</i>   | Annelida     | Tubificidae      | Static-renewal | 4               | LC <sub>50</sub> | Mortality    | 799           | [126]     |
| Algae         | <i>Scenedesmus armatus</i>        | Chlorophyta  | Scenedesmaaceae  | Static         | 7               | NOEC             | Growth rate  | 5000          | [134]     |
| Algae         | <i>Scenedesmus subspicatus</i>    | Chlorophyta  | Scenedesmaaceae  | Static         | 7               | NOEC             | Growth rate  | 2750          | [135]     |
| Crustaceans   | <i>Daphnia magna</i>              | Arthropoda   | Daphniidae       | Static-renewal | 21              | EC <sub>10</sub> | Growth       | 191           | [126]     |
| Crustaceans   | <i>Daphnia pulex</i>              | Arthropoda   | Daphniidae       | Renewal        | 16              | NOEC             | Growth       | 60            | [136]     |
| Fish          | <i>Carassius auratus</i>          | Chordata     | Cyprinidae       | Renewal        | 21              | NOEC             | Enzyme       | 50            | [137]     |
| Fish          | <i>Misgurnus anguillicaudatus</i> | Chordata     | Cobitidae        | Static-renewal | 28              | EC <sub>10</sub> | Growth       | 540           | [12]      |
| Fish          | <i>Oncorhynchus mykiss</i>        | Chordata     | Salmonidae       | Flow-through   | 90              | NOEC             | Mortality    | 5             | [129]     |
| Fish          | <i>Oryzias latipes</i>            | Chordata     | Adrianichthyidae | Renewal        | 18              | NOEC             | Development  | 100           | [138]     |
| Fish          | <i>Rhodeus sinensis</i>           | Chordata     | Cyprinidae       | Static-renewal | 28              | EC <sub>10</sub> | Growth       | 435           | [126]     |



**Table S9.** Acute toxicity values (AVs) (S<sub>n</sub>=11) of pyrene (PYR) to aquatic organisms.

| Aquatic biota | Species                                      | Phylum      | Family        | Exposure Type | Duration (Days) | Endpoint         | Effect       | AV/C V (µg/L) | Geom. * (µg/L) | Reference |
|---------------|----------------------------------------------|-------------|---------------|---------------|-----------------|------------------|--------------|---------------|----------------|-----------|
| Algae         | <i>Chlorella fusca</i> var. <i>vacuolata</i> | Chlorophyta | Chlorellaceae | Static        | 1               | EC <sub>50</sub> | Growth rate  | 49.73         | 25.71          | [139]     |
|               |                                              |             |               | Static        | 1               | EC <sub>50</sub> | Growth rate  | 48.54         |                | [140]     |
|               |                                              |             |               | Static        | 1               | EC <sub>50</sub> | Growth rate  | 7.038         |                | [61]      |
| Algae         | <i>Raphidocelis subcapitata</i>              | Chlorophyta | Chlorellaceae | Static        | 3               | EC <sub>50</sub> | Intoxication | 894000        |                | [141]     |
| Crustaceans   | <i>Callinectes sapidus</i>                   | Arthropoda  | Portunidae    |               | 4               | LC <sub>50</sub> | Mortality    | 10            |                | [78]      |
| Crustaceans   | <i>Daphnia magna</i>                         | Arthropoda  | Daphniidae    | Static        | 1               | EC <sub>50</sub> | Mortality    | 10            | 6.579          | [142]     |
|               |                                              |             |               |               | 2               | EC <sub>50</sub> | Mortality    | 4.328         |                | [65]      |
| Crustaceans   | <i>Hyoplax formosensis</i>                   | Arthropoda  | Ocypodidae    |               | 4               | LC <sub>50</sub> | Mortality    | 11            |                | [78]      |
| Crustaceans   | <i>Neomysis awatschensis</i>                 | Arthropoda  | Mysidae       | Renewal       | 4               | LC <sub>50</sub> | Mortality    | 15            |                | [130]     |
| Fish          | <i>Oncorhynchus mykiss</i>                   | Chordata    | Salmonidae    | Renewal       | 4               | LC <sub>50</sub> | Mortality    | 2000          |                | [143]     |
| Fish          | <i>Pimephales promelas</i>                   | Chordata    | Cyprinidae    |               | 4               | LC <sub>50</sub> | Mortality    | 200           |                | [78]      |
| Insect        | <i>Aedes aegypti</i>                         | Arthropoda  | Culicidae     | Static        | 1               | LC <sub>50</sub> | Mortality    | 35            |                | [72]      |
| Insect        | <i>Aedes taeniorhynchus</i>                  | Arthropoda  | Culicidae     | Static        | 1               | LC <sub>50</sub> | Mortality    | 60            |                | [72]      |
| Insect        | <i>Culex quinquefasciatus</i>                | Arthropoda  | Culicidae     | Static        | 1               | LC <sub>50</sub> | Mortality    | 37            |                | [72]      |

\* Geom. refers to the geometrical mean of several values for one Species under one endpoint.

**Table S10.** Species groups involved in the toxicity data of the polycyclic aromatic hydrocarbons (PAHs).

| PAH   | $n_{AV}^*$ | $n_{CV}^*$ | Algae | Amphibian | Crustaceans | Fish | Insect | Invertebrate | Mollusca | Plant | Worm |
|-------|------------|------------|-------|-----------|-------------|------|--------|--------------|----------|-------|------|
| ACE   | 13         |            | √     |           | √           | √    | √      |              | √        |       |      |
| ANT   | 10         |            | √     |           | √           | √    | √      |              |          |       |      |
| B[a]P | 21         |            | √     | √         | √           | √    | √      |              |          |       |      |
|       |            | 8          |       |           | √           | √    |        |              | √        |       |      |
| FLA   | 31         |            |       | √         | √           | √    | √      | √            | √        |       | √    |
|       |            | 10         |       |           | √           | √    | √      |              | √        |       | √    |
| FLO   | 10         |            | √     |           | √           | √    | √      |              | √        |       |      |
|       |            | 5          | √     |           | √           | √    | √      |              |          |       |      |
| NAP   | 25         |            | √     | √         | √           | √    | √      |              | √        |       |      |
| PHE   | 29         |            | √     | √         | √           | √    | √      | √            |          |       | √    |
|       |            | 9          | √     |           | √           | √    |        |              |          |       |      |
| PYR   | 11         |            | √     |           | √           | √    | √      |              |          |       |      |

\*  $n_{AV}$  and  $n_{CV}$  refer to the number of samples having acute and chronic toxicity values, respectively.

**Table S11.** The fitting parameters ( $a$  and  $b$ ) and goodness of fit ( $R^2$ , RMSE and RMSE<sub>50</sub>) of various SSD models based on the acute toxicity values (AVs) of the eight PAHs.

| PAH | SSD model          | $a$    | $b$    | $R^2$  | RMSE <sub>50</sub> | RMSE    |
|-----|--------------------|--------|--------|--------|--------------------|---------|
| ACE | Arctangent         | 2.86   | 0.40   | 0.9146 | 0.02243            | 0.08313 |
|     | Dagum              | 0.80   | 128.66 | 0.9131 | 0.05594            | 0.08843 |
|     | Error              | 1.15   | 3.29   | 0.9243 | 0.02826            | 0.08089 |
|     | Gompertz           | 127.31 | 1.85   | 0.9131 | 0.05643            | 0.08854 |
|     | Gudermannian       | 2.16   | 6.18   | 0.9236 | 0.01617            | 0.08043 |
|     | Hyperbolic tangent | 1.34   | 3.83   | 0.9242 | 0.02105            | 0.08047 |
|     | Logistic           | 2.86   | 0.37   | 0.9242 | 0.02105            | 0.08047 |
|     | Normal             | 2.81   | 0.51   | 0.9204 | 0.04807            | 0.09484 |
|     | Weibull            | -5.92  | 1.92   | 0.9284 | 0.01048            | 0.07734 |
|     |                    |        |        |        |                    |         |
| ANT | Arctangent         | 1.38   | 0.74   | 0.9699 | 0.04943            | 0.05037 |
|     | Dagum              | 0.45   | 3.20   | 0.9769 | 0.03771            | 0.04432 |
|     | Error              | 0.55   | 0.78   | 0.9709 | 0.04047            | 0.04976 |
|     | Gompertz           | 2.37   | 0.91   | 0.9771 | 0.04046            | 0.04408 |
|     | Gudermannian       | 1.06   | 1.49   | 0.9710 | 0.04278            | 0.04963 |
|     | Hyperbolic tangent | 0.65   | 0.92   | 0.9710 | 0.04176            | 0.04971 |

---

|       |                    |       |      |        |         |         |
|-------|--------------------|-------|------|--------|---------|---------|
| B[a]P | Logistic           | 1.41  | 0.77 | 0.9710 | 0.04176 | 0.04971 |
|       | Normal             | 1.46  | 1.02 | 0.9576 | 0.05999 | 0.07032 |
|       | Weibull            | -1.63 | 0.84 | 0.9481 | 0.06346 | 0.06592 |
|       | Arctangent         | 0.98  | 0.75 | 0.9126 | 0.08595 | 0.08777 |
|       | Dagum              | 0.45  | 2.45 | 0.9192 | 0.07125 | 0.08753 |
|       | Error              | 0.49  | 0.57 | 0.8964 | 0.08859 | 0.09894 |
|       | Gompertz           | 1.78  | 0.89 | 0.9301 | 0.06382 | 0.08029 |
|       | Gudermannian       | 0.98  | 1.08 | 0.9038 | 0.08699 | 0.09472 |
|       | Hyperbolic tangent | 0.59  | 0.67 | 0.9019 | 0.08657 | 0.09625 |
|       | Logistic           | 1.13  | 0.84 | 0.9018 | 0.08669 | 0.09625 |
| FLA   | Normal             | 1.40  | 1.36 | 0.8796 | 0.07879 | 0.11685 |
|       | Weibull            | -1.46 | 0.99 | 0.8868 | 0.08556 | 0.11456 |
|       | Arctangent         | 2.01  | 0.59 | 0.9760 | 0.03997 | 0.04460 |
|       | Dagum              | 0.50  | 7.46 | 0.9786 | 0.02885 | 0.04333 |
|       | Error              | 0.63  | 1.31 | 0.9644 | 0.03745 | 0.05587 |
|       | Gompertz           | 6.29  | 1.10 | 0.9793 | 0.03037 | 0.04266 |
|       | Gudermannian       | 1.27  | 2.60 | 0.9704 | 0.03368 | 0.05093 |
|       | Hyperbolic tangent | 0.77  | 1.57 | 0.9679 | 0.03479 | 0.05307 |
|       | Logistic           | 2.05  | 0.65 | 0.9679 | 0.03480 | 0.05307 |
|       | Normal             | 2.15  | 1.06 | 0.9595 | 0.02965 | 0.06217 |
|       | Weibull            | -2.36 | 0.93 | 0.9329 | 0.06307 | 0.07641 |

---

Table S11. (Continued).

| PAH | SSD model          | <i>a</i> | <i>b</i> | <i>R</i> <sup>2</sup> | RMSE <sub>50</sub> | RMSE    |
|-----|--------------------|----------|----------|-----------------------|--------------------|---------|
| FLO | Arctangent         | 3.20     | 0.42     | 0.9811                | 0.04116            | 0.03955 |
|     | Dagum              | 0.73     | 140.77   | 0.9812                | 0.02098            | 0.04143 |
|     | Error              | 1.10     | 3.51     | 0.9819                | 0.01034            | 0.04156 |
|     | Gompertz           | 138.17   | 1.67     | 0.9811                | 0.02127            | 0.04149 |
|     | Gudermannian       | 2.04     | 6.51     | 0.9830                | 0.01765            | 0.03948 |
|     | Hyperbolic tangent | 1.27     | 4.05     | 0.9827                | 0.01367            | 0.04013 |
|     | Logistic           | 3.19     | 0.39     | 0.9827                | 0.01367            | 0.04013 |
|     | Normal             | 3.28     | 0.74     | 0.9510                | 0.03670            | 0.06584 |
|     | Weibull            | -6.37    | 1.86     | 0.9787                | 0.03003            | 0.04498 |
| NAP | Arctangent         | 3.64     | 0.33     | 0.9836                | 0.04248            | 0.03627 |
|     | Dagum              | 0.98     | 2585.31  | 0.9872                | 0.04261            | 0.03432 |
|     | Error              | 1.33     | 4.85     | 0.9802                | 0.04626            | 0.04285 |
|     | Gompertz           | 2581.68  | 2.26     | 0.9872                | 0.04261            | 0.03432 |
|     | Gudermannian       | 2.49     | 9.11     | 0.9838                | 0.04279            | 0.03797 |
|     | Hyperbolic tangent | 1.54     | 5.64     | 0.9825                | 0.04396            | 0.03976 |
|     | Logistic           | 3.66     | 0.32     | 0.9825                | 0.04396            | 0.03976 |
|     | Normal             | 3.68     | 0.64     | 0.9669                | 0.05825            | 0.05130 |
|     | Weibull            | -8.03    | 2.08     | 0.9687                | 0.05275            | 0.05351 |
| PHE | Arctangent         | 2.56     | 0.30     | 0.9779                | 0.04225            | 0.04208 |
|     | Dagum              | 0.89     | 121.25   | 0.9624                | 0.05971            | 0.05684 |
|     | Error              | 1.33     | 3.37     | 0.9777                | 0.04192            | 0.04413 |
|     | Gompertz           | 119.62   | 2.06     | 0.9622                | 0.06010            | 0.05702 |
|     | Gudermannian       | 2.58     | 6.55     | 0.9804                | 0.03909            | 0.04085 |
|     | Hyperbolic tangent | 1.58     | 4.00     | 0.9795                | 0.04019            | 0.04201 |
|     | Logistic           | 2.54     | 0.32     | 0.9795                | 0.04019            | 0.04201 |
|     | Normal             | 2.52     | 0.53     | 0.9776                | 0.04428            | 0.04449 |
|     | Weibull            | -6.40    | 2.36     | 0.9827                | 0.03004            | 0.03953 |
| PYR | Arctangent         | 1.53     | 0.46     | 0.9590                | 0.07202            | 0.06231 |
|     | Dagum              | 0.69     | 8.27     | 0.9587                | 0.04602            | 0.06550 |
|     | Error              | 0.95     | 1.48     | 0.9399                | 0.05866            | 0.08094 |
|     | Gompertz           | 6.83     | 1.49     | 0.9607                | 0.04482            | 0.06346 |
|     | Gudermannian       | 1.78     | 2.76     | 0.9443                | 0.06393            | 0.07658 |

|                    |       |      |        |         |         |
|--------------------|-------|------|--------|---------|---------|
| Hyperbolic tangent | 1.10  | 1.71 | 0.9425 | 0.06170 | 0.07832 |
| Logistic           | 1.55  | 0.45 | 0.9425 | 0.06171 | 0.07832 |
| Normal             | 1.99  | 1.49 | 0.7930 | 0.10242 | 0.13658 |
| Weibull            | -2.85 | 1.57 | 0.9188 | 0.07670 | 0.09532 |

**Table S12.** The fitting parameters ( $a$  and  $b$ ) and goodness of fit ( $R^2$ , RMSE and RMSE<sub>50</sub>) of various SSD models based on the chronic toxicity values (CVs) or ACR-transformed values (CV<sub>ESS</sub>) of the four PAHs.

| PAH    | Function           | $a$   | $b$  | $R^2$  | RMSE <sub>50</sub> | RMSE    |
|--------|--------------------|-------|------|--------|--------------------|---------|
| B[a]P  | Arctangent         | 0.04  | 0.65 | 0.9022 | 0.10140            | 0.09201 |
|        | Dagum              | 0.66  | 1.12 | 0.9064 | 0.09497            | 0.08948 |
|        | Error              | 0.67  | 0.08 | 0.9056 | 0.09577            | 0.08977 |
|        | Gompertz           | 0.73  | 1.17 | 0.9240 | 0.08142            | 0.08123 |
|        | Gudermannian       | 1.26  | 0.12 | 0.9033 | 0.09806            | 0.09081 |
|        | Hyperbolic tangent | 0.78  | 0.08 | 0.9043 | 0.09700            | 0.09034 |
|        | Logistic           | 0.11  | 0.64 | 0.9043 | 0.09700            | 0.09034 |
|        | Normal             | 0.15  | 0.75 | 0.8934 | 0.11813            | 0.12438 |
|        | Weibull            | -0.56 | 1.03 | 0.8847 | 0.11149            | 0.09814 |
|        |                    |       |      |        |                    |         |
| B[a]P* | Arctangent         | 0.37  | 0.75 | 0.9126 | 0.08593            | 0.08777 |
|        | Dagum              | 0.47  | 1.52 | 0.9112 | 0.07784            | 0.09146 |
|        | Error              | 0.49  | 0.27 | 0.8964 | 0.08862            | 0.09894 |
|        | Gompertz           | 1.04  | 0.89 | 0.9300 | 0.06383            | 0.08029 |
|        | Gudermannian       | 0.97  | 0.49 | 0.9037 | 0.08709            | 0.09472 |
|        | Hyperbolic tangent | 0.59  | 0.31 | 0.9018 | 0.08670            | 0.09625 |
|        | Logistic           | 0.52  | 0.84 | 0.9018 | 0.08668            | 0.09625 |
|        | Normal             | 0.80  | 1.36 | 0.8796 | 0.07879            | 0.11685 |
|        | Weibull            | -0.86 | 0.99 | 0.8867 | 0.08563            | 0.11456 |
|        |                    |       |      |        |                    |         |
| FLA    | Arctangent         | 1.89  | 0.70 | 0.9298 | 0.09628            | 0.07455 |
|        | Dagum              | 0.52  | 6.50 | 0.9556 | 0.07128            | 0.06060 |
|        | Error              | 0.68  | 1.29 | 0.9546 | 0.08315            | 0.06132 |
|        | Gompertz           | 5.39  | 1.12 | 0.9563 | 0.06813            | 0.06015 |
|        | Gudermannian       | 1.26  | 2.39 | 0.9484 | 0.08681            | 0.06499 |
|        | Hyperbolic tangent | 0.78  | 1.49 | 0.9514 | 0.08506            | 0.06324 |
|        | Logistic           | 1.90  | 0.64 | 0.9514 | 0.08506            | 0.06324 |
|        | Normal             | 1.91  | 0.77 | 0.9320 | 0.11962            | 0.09467 |
|        |                    |       |      |        |                    |         |

|      |                    |       |      |        |         |         |
|------|--------------------|-------|------|--------|---------|---------|
| FLA* | Weibull            | -2.51 | 1.09 | 0.9480 | 0.09734 | 0.06555 |
|      | Arctangent         | 1.36  | 0.59 | 0.9760 | 0.03997 | 0.04460 |
|      | Dagum              | 0.52  | 3.95 | 0.9778 | 0.02804 | 0.04420 |
|      | Error              | 0.63  | 0.89 | 0.9644 | 0.03743 | 0.05587 |
|      | Gompertz           | 3.06  | 1.10 | 0.9793 | 0.03037 | 0.04266 |
|      | Gudermannian       | 1.27  | 1.76 | 0.9704 | 0.03369 | 0.05093 |
|      | Hyperbolic tangent | 0.77  | 1.07 | 0.9679 | 0.03479 | 0.05307 |
|      | Logistic           | 1.40  | 0.65 | 0.9679 | 0.03479 | 0.05307 |
|      | Normal             | 1.49  | 1.06 | 0.9595 | 0.02965 | 0.06217 |
|      | Weibull            | -1.75 | 0.93 | 0.9329 | 0.06307 | 0.07641 |

Table S12. (Continued) .

| PAH  | Function           | a     | b     | R <sup>2</sup> | RMSE <sub>50</sub> | RMSE    |
|------|--------------------|-------|-------|----------------|--------------------|---------|
| FLO* | Arctangent         | 2.62  | 0.42  | 0.9811         | 0.04116            | 0.03955 |
|      | Dagum              | 0.73  | 54.66 | 0.9813         | 0.02054            | 0.04134 |
|      | Error              | 1.10  | 2.87  | 0.9819         | 0.01034            | 0.04156 |
|      | Gompertz           | 52.43 | 1.67  | 0.9811         | 0.02127            | 0.04149 |
|      | Gudermannian       | 2.04  | 5.33  | 0.9830         | 0.01765            | 0.03948 |
|      | Hyperbolic tangent | 1.27  | 3.32  | 0.9827         | 0.01367            | 0.04013 |
|      | Logistic           | 2.61  | 0.39  | 0.9827         | 0.01367            | 0.04013 |
|      | Normal             | 2.70  | 0.74  | 0.9510         | 0.03670            | 0.06584 |
|      | Weibull            | -5.29 | 1.86  | 0.9787         | 0.03003            | 0.04498 |
| PHE  | Arctangent         | 2.31  | 0.65  | 0.9798         | 0.05554            | 0.04086 |
|      | Dagum              | 0.51  | 10.59 | 0.9777         | 0.07147            | 0.04551 |
|      | Error              | 0.66  | 1.54  | 0.9781         | 0.06198            | 0.04418 |
|      | Gompertz           | 9.65  | 1.15  | 0.9768         | 0.07444            | 0.04681 |
|      | Gudermannian       | 1.27  | 2.96  | 0.9818         | 0.05494            | 0.03995 |
|      | Hyperbolic tangent | 0.78  | 1.82  | 0.9805         | 0.05739            | 0.04155 |
|      | Logistic           | 2.33  | 0.64  | 0.9805         | 0.05738            | 0.04155 |
|      | Normal             | 2.33  | 0.92  | 0.9749         | 0.06383            | 0.05170 |
|      | Weibull            | -2.80 | 1.02  | 0.9644         | 0.06866            | 0.05558 |
| PHE* | Arctangent         | 1.85  | 0.30  | 0.9779         | 0.04225            | 0.04208 |
|      | Dagum              | 0.90  | 29.58 | 0.9629         | 0.05872            | 0.05630 |
|      | Error              | 1.33  | 2.43  | 0.9777         | 0.04192            | 0.04413 |

|                    |       |      |        |         |         |
|--------------------|-------|------|--------|---------|---------|
| Gompertz           | 28.06 | 2.06 | 0.9622 | 0.06010 | 0.05702 |
| Gudermannian       | 2.58  | 4.73 | 0.9804 | 0.03908 | 0.04085 |
| Hyperbolic tangent | 1.58  | 2.89 | 0.9795 | 0.04019 | 0.04201 |
| Logistic           | 1.83  | 0.32 | 0.9795 | 0.04020 | 0.04201 |
| Normal             | 1.82  | 0.53 | 0.9776 | 0.04428 | 0.04449 |
| Weibull            | -4.74 | 2.36 | 0.9827 | 0.03004 | 0.03953 |

\* refer to the models based on the  $CV_{ES}$ .

**Table S13.** The comparison between the SSD curves based on the acute toxicity value (AV), chronic toxicity value (CV) and ACR-transformed toxicity value ( $CV_{ES}$ ) from three perspectives.

| (a) $HC_5$ |        |      |           |       |               |               |
|------------|--------|------|-----------|-------|---------------|---------------|
| PAHs       | AV     | CV   | $CV_{ES}$ | AV/CV | CV/ $CV_{ES}$ | AV/ $CV_{ES}$ |
| BAP        | 0.26   | 0.06 | 0.06      | 4.24  | 0.96          | 4.06          |
| FLA        | 4.09   | 3.33 | 0.78      | 1.23  | 4.26          | 5.22          |
| PHE        | 28.43  | 2.14 | 5.61      | 13.26 | 0.38          | 5.07          |
| FLO        | 135.79 |      | 35.83     |       |               | 3.79          |

  

| (b) the means of $\log_{10}$ -transformed toxicity value. |      |      |           |       |               |               |
|-----------------------------------------------------------|------|------|-----------|-------|---------------|---------------|
| PAHs                                                      | AV   | CV   | $CV_{ES}$ | AV-CV | CV- $CV_{ES}$ | AV- $CV_{ES}$ |
| BAP                                                       | 1.40 | 0.15 | 0.80      | 1.26  | -0.65         | 0.61          |
| FLA                                                       | 2.15 | 2.01 | 1.49      | 0.13  | 0.52          | 0.66          |
| PHE                                                       | 2.52 | 2.33 | 1.82      | 0.19  | 0.51          | 0.71          |
| FLO                                                       | 3.28 |      | 2.70      |       |               | 0.58          |

  

| (c) the standard deviations (SDs) of $\log_{10}$ -transformed toxicity value |      |      |           |       |               |               |
|------------------------------------------------------------------------------|------|------|-----------|-------|---------------|---------------|
| PAHs                                                                         | AV   | CV   | $CV_{ES}$ | AV-CV | CV- $CV_{ES}$ | AV- $CV_{ES}$ |
| BAP                                                                          | 1.36 | 0.75 | 1.36      | 0.61  | -0.61         | 0.00          |
| FLA                                                                          | 1.06 | 0.75 | 1.06      | 0.31  | -0.31         | 0.00          |
| PHE                                                                          | 0.53 | 0.92 | 0.53      | -0.40 | 0.40          | 0.00          |
| FLO                                                                          | 0.74 |      | 0.74      |       |               | 0.00          |
